# Supplementary material for: Methionine adenosyltransferase α2 sumoylation positively regulate Bcl-2 expression in human colon and liver cancer cells
Source: PubMed Central journal article supplement (PMC4741959; doi:10.18632/oncotarget.5342), 2015-09-25
Supplement: oncotarget-06-37706-s001.pdf [file oncotarget-06-37706-s001.pdf]

## SUPPLEMENTARY FIGURES AND TABLES

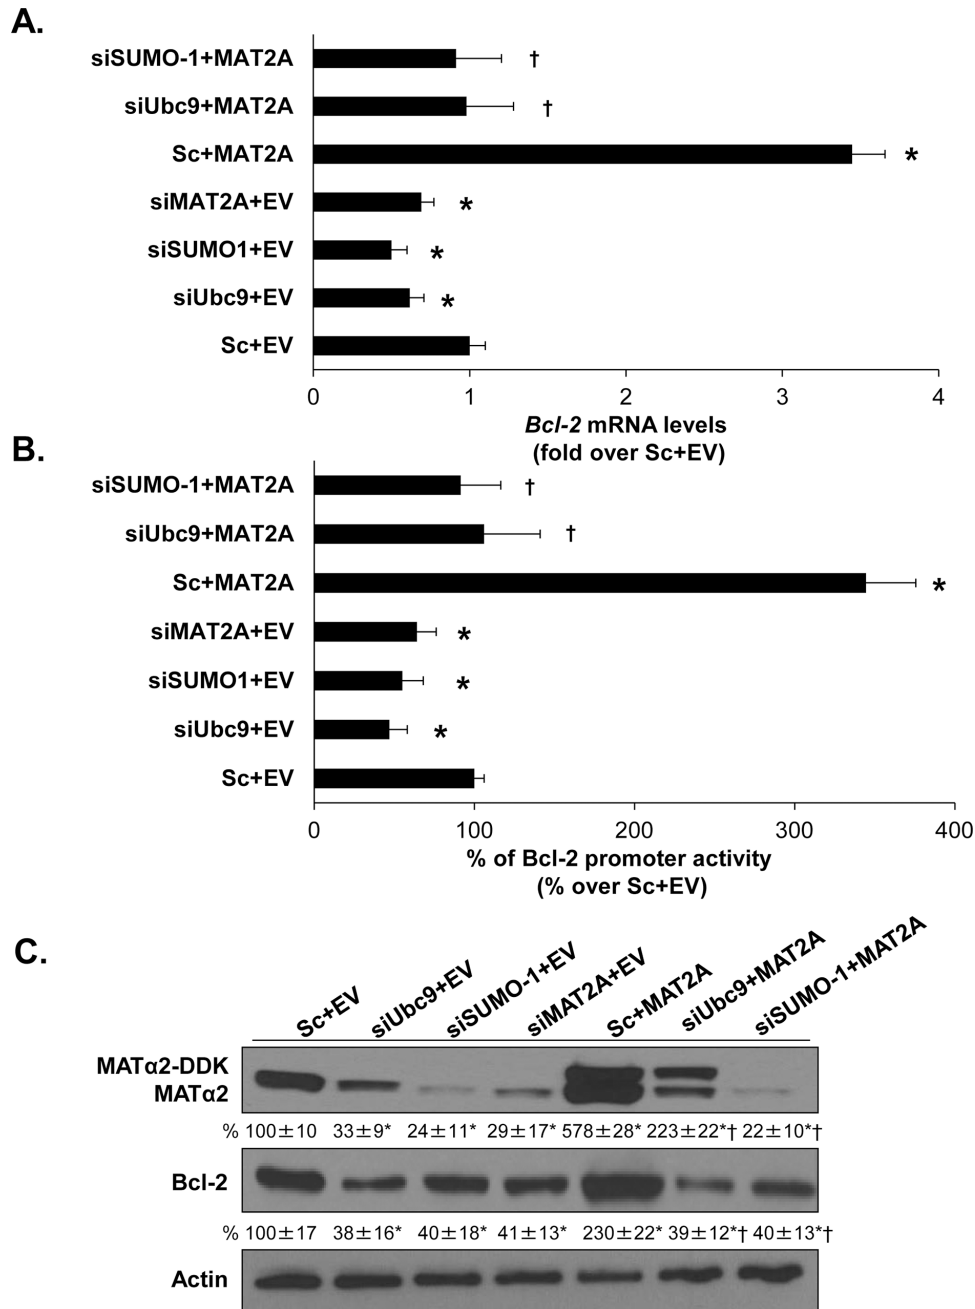

**Supplementary Figure S1: MAT2A and sumoylation machinery regulate Bcl-2 expression in RKO cells.** **A.** RKO cells were transfected with siMAT2A, siUbc9 and siSUMO-1 (20 nM) or scrambled siRNA (Sc) for 48 hours and/or MAT2A overexpression vector or empty vector (EV) for 24 hours. The mRNA levels of Bcl-2 were compared to Sc+EV using real-time PCR. Results represent mean  $\pm$  SEM from 3 experiments in duplicates, \* $p$  < 0.04 vs. Sc+EV control; † $p$  < 0.04 vs. Sc+MAT2A overexpression vector. **B.** Following the same treatments as in “A”, RKO cells were transfected with the human *Bcl-2* promoter or pBS-basic as described in Methods. The luciferase activity driven by *Bcl-2* promoter was normalized to that of pBS-Basic and expressed as % over Sc+EV. Results represent mean  $\pm$  SEM from 4 experiments in duplicate, \* $p$  < 0.04 vs. Sc+EV control; † $p$  < 0.03 vs. Sc+MAT2A overexpression vector. **C.** Cells were treated as in “A” and total cellular protein was subjected to Western blotting with antibodies against MAT $\alpha$ 2 or Bcl-2. Densitometric changes were normalized to actin. Representative images and densitometric analysis (% mean  $\pm$  SEM of Sc+EV, indicated below the blots) from 3 experiments in RKO cells are shown. \* $p$  < 0.03 vs. Sc+EV, † $p$  < 0.001 vs. Sc+MAT2A overexpression vector.

**A.**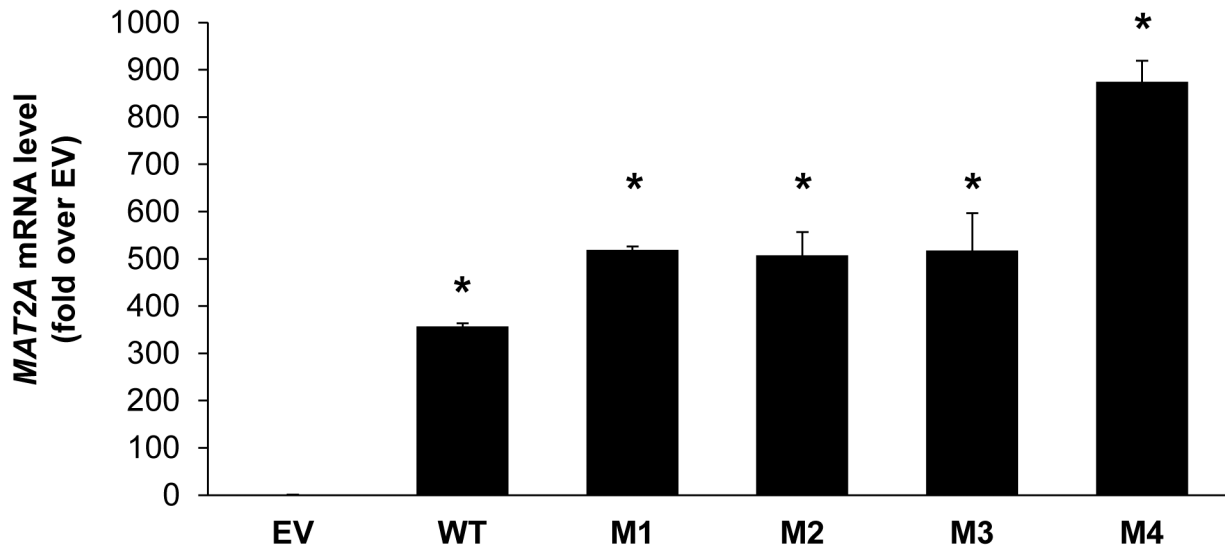**B.**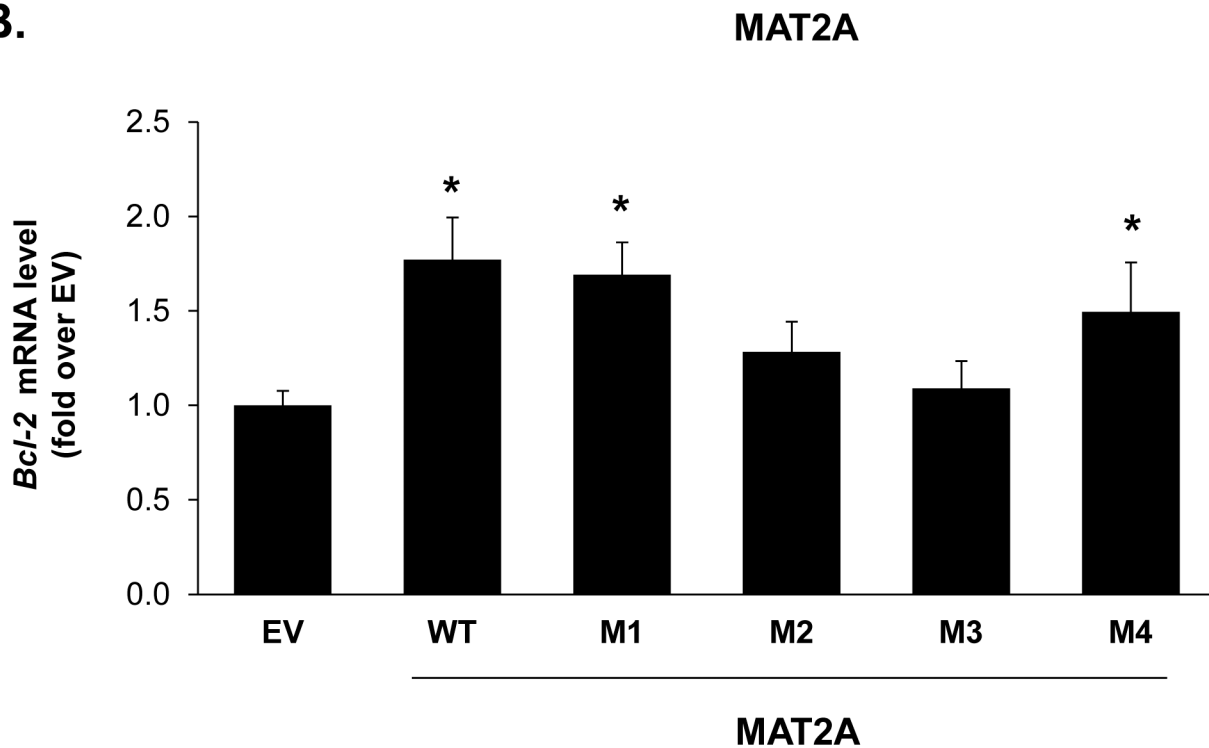

**Supplementary Figure S2: Effects of wild-type or mutant MAT2A overexpression on MAT2A and Bcl-2 mRNA levels in RKO cells.** RKO cells were transfected with empty vector (EV), hMAT2A-WT, hMAT2A-M1, and hMAT2A-M2, hMAT2A-M3 and hMAT2A-M4 for 24 hours as described in Methods. **A–B.** MAT2A and Bcl-2 expression was determined by real-time PCR. mRNA results are expressed as mean % of EV  $\pm$  SEM from 3 independent experiments. \* $p < 0.01$  vs. EV control for (A), \* $p < 0.03$  for (B).

**Supplementary Table S1: EMSA primers of Bcl-2 P2 promoter**

|                                                                                                                                                                                                                                                                                                                                                                                                                                                                                                                                                                                                                                                                                                                                                                                                                                                                                                                                             |                              |
|---------------------------------------------------------------------------------------------------------------------------------------------------------------------------------------------------------------------------------------------------------------------------------------------------------------------------------------------------------------------------------------------------------------------------------------------------------------------------------------------------------------------------------------------------------------------------------------------------------------------------------------------------------------------------------------------------------------------------------------------------------------------------------------------------------------------------------------------------------------------------------------------------------------------------------------------|------------------------------|
| Probe 1 Fw                                                                                                                                                                                                                                                                                                                                                                                                                                                                                                                                                                                                                                                                                                                                                                                                                                                                                                                                  | TGCGGATTGACATTTCTGTGAA       |
| Probe 1 Rev                                                                                                                                                                                                                                                                                                                                                                                                                                                                                                                                                                                                                                                                                                                                                                                                                                                                                                                                 | TTCACAGAAATGTCAATCCGCA       |
| Probe 2 Fw                                                                                                                                                                                                                                                                                                                                                                                                                                                                                                                                                                                                                                                                                                                                                                                                                                                                                                                                  | GGTTTAATGTAAC TTCAATGG       |
| Probe 2 Rev                                                                                                                                                                                                                                                                                                                                                                                                                                                                                                                                                                                                                                                                                                                                                                                                                                                                                                                                 | CCATTGAAAGTTACATTA AAC       |
| Probe 3 Fw                                                                                                                                                                                                                                                                                                                                                                                                                                                                                                                                                                                                                                                                                                                                                                                                                                                                                                                                  | GGCAGCTTAATACATTCTTTT TAGCCG |
| Probe 3 Rev                                                                                                                                                                                                                                                                                                                                                                                                                                                                                                                                                                                                                                                                                                                                                                                                                                                                                                                                 | CGGCTAAAAAGAATGTATTAAGCTGCC  |
| <p><b>BCL-2 P2 PROMOTER SEQUENCE:</b></p> <p>GGTTGGGATTCC<b>TGCGGATTGACA</b><br/> <b>TTTCTGTGAA</b>GCAGAAGTCTGGGAATCGATCTGGAAATCCTCCTAATTTT<br/> TACTCCCTCTCCCCGCGACTCCTGATTCATTGGGAAGTTTCAAATCAGCT<br/> ATAACTGGAGAGTGCTGAAGATTGATGGGATCGTTGCCTTATGCATTTGT<br/> TTTGGTTTTACAAAAAGGAACTTGACAGAGGATCATGCTGTACTTAAAA<br/> AATACAAGTAAGTTCTCTGCACAGGAAATT<b>GGTTTAATGTAAC TTCAAT</b><br/> <b>GG</b>AAACCTTTGAGATTTTTTACTTAAAGTGCATTCGAGTAAATTTAATTT<br/> CC<b>AGGCAGCTTAATACATTCTTTT TAGCCG</b>TGTTACTTGTAGTGTGTATG<br/> CCCTGCTTTCACTCAGTGTGTACAGGGAAACGCACCTGATTTTTTACTTA<br/> TTAGTTTGTTTTTTCTTTAACCTTTCAGCATCACAGAGGAAGTAGACTGA<br/> TATTAACAATACTTACTAATAATAACGTGCCTCATGAAATAAAGATCCGA<br/> AAGGAATTGGAATAAAAATTTCTGCATCTCATGCCAAGGGGAAACACC<br/> AGAATCAAGTGTTCCGCGTGATTGAAGACACCCCTCGTCCAAGAATGCA<br/> AAGCACATCCAATAAATAAGCTGGATTATAACTCCTCTTCTTTCTCTGGG<br/> GGCCGTGGGGTGGGAGCTGGGGCGAGAGGTGCCGTTGGCCCCCGTTGCTT TTCCTCTGGGAAGGATG</p> |                              |

**Supplementary Table S2: Site-directed mutagenesis primers of MAT $\alpha$ 2 sumoylation sites**

|                 |                                         |
|-----------------|-----------------------------------------|
| MAT2A mut 1 Fw  | TTGGGTGGCAAATCCCTTGTTAGAGGAGGTCTGTG     |
| MAT2A mut 1 Rev | CACAGACCTCCTCTAACAAGGATTTTGCCACCCAA     |
| MAT2A mut 2 Fw  | CATTATGGTACCTCTCAGAGGAGTGAGAGAGAGCTATTA |
| MAT2A mut 2 Rev | TAATAGCTCTCTCTCACTCCTCTGAGAGGTACCATAATG |
| MAT2A mut 3 Fw  | TCAGGGATCTGGATCTGAGGAAGCCAATTTATCAGAG   |
| MAT2A mut 3 Rev | CTCTGATAAATTGGCTTCCTCAGATCCAGATCCCTGA   |
| MAT2A mut 4 Fw  | AGTGCCCAAAAAGCTTAGATATACGCGTACGCGGC     |
| MAT2A mut 4 Rev | GCCGCGTACGCGTATATCTAAGCTTTTTGGGCACT     |
